# Supplementary material for: Suppressing water clusters by using “hydrotropic” ionic liquids for highly stable aqueous lithium-ion batteries
Source: Royal Society of Chemistry journal article supplement (doi:10.1039/d2ta04048d), 2022-01-01
Supplement: d2ta04048d1.pdf [file d2ta04048d1.pdf]

## Supporting Information

### Suppressing Water Clusters by “Hydrotropic” Ionic Liquid for Highly Stable Aqueous Lithium-ion Batteries

Canfu Zhang,<sup>a</sup> Binbin Chen,<sup>a</sup> Ziyang Cai,<sup>a</sup> Fenglin Zhang,<sup>a</sup> Renzhi Huang,<sup>ab</sup> Mengdie Yan,<sup>a</sup> Yingchun Liu<sup>a</sup> and Huilin Pan<sup>\*ac</sup>

- a. Department of Chemistry, Zhejiang University, Hangzhou 310027, P. R. China
- b. Zhejiang Provincial Key Laboratory of Advanced Chemical Engineering Manufacture Technology, College of Chemical and Biological Engineering, Zhejiang University, Hangzhou 310027, P. R. China
- c. State Key Laboratory of Clean Energy Utilization, Zhejiang University, Hangzhou 310027, P. R. China

\*Corresponding authors:

Huilin Pan (panhuilin@zju.edu.cn)

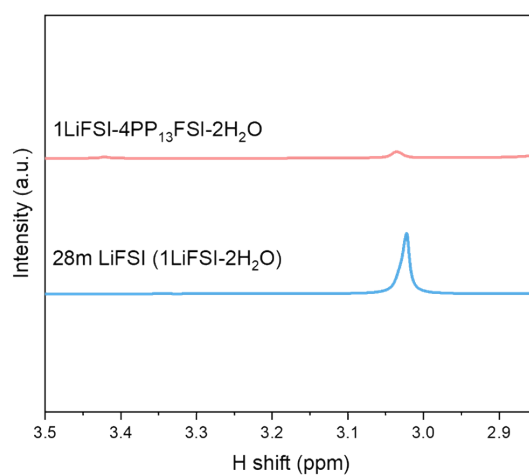

**Figure S1.**  $^1\text{H}$  measurement for different aqueous electrolytes with and without PP<sub>13</sub>FSI.

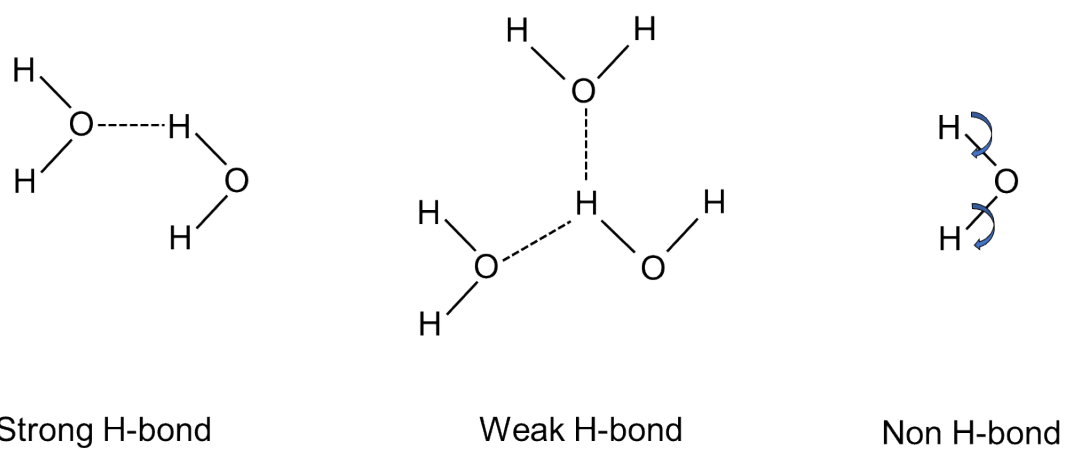

**Figure S2.** Corresponding vibrational structure of three types of O-H bonds.

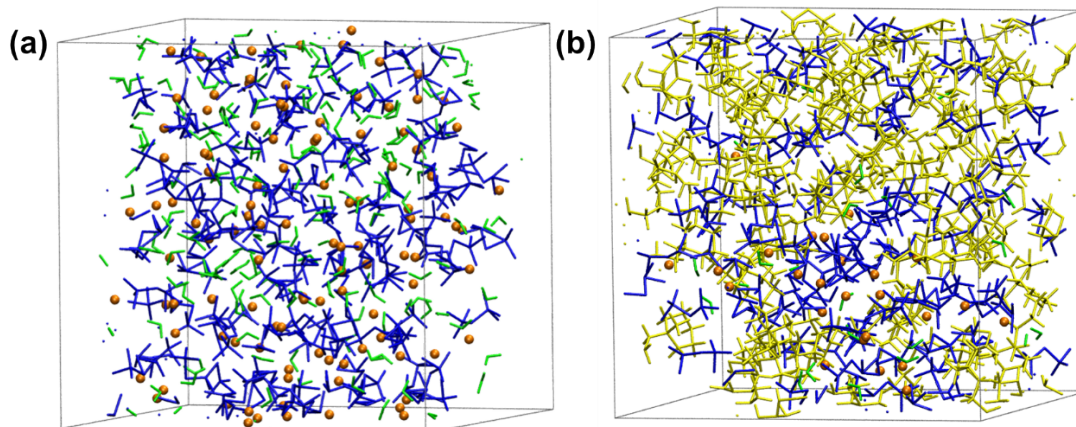

**Figure S3.** MD simulations results for **a)** 35 m LiFSI and **b)** 1LiFSI-4PP<sub>13</sub>FSI-1H<sub>2</sub>O.

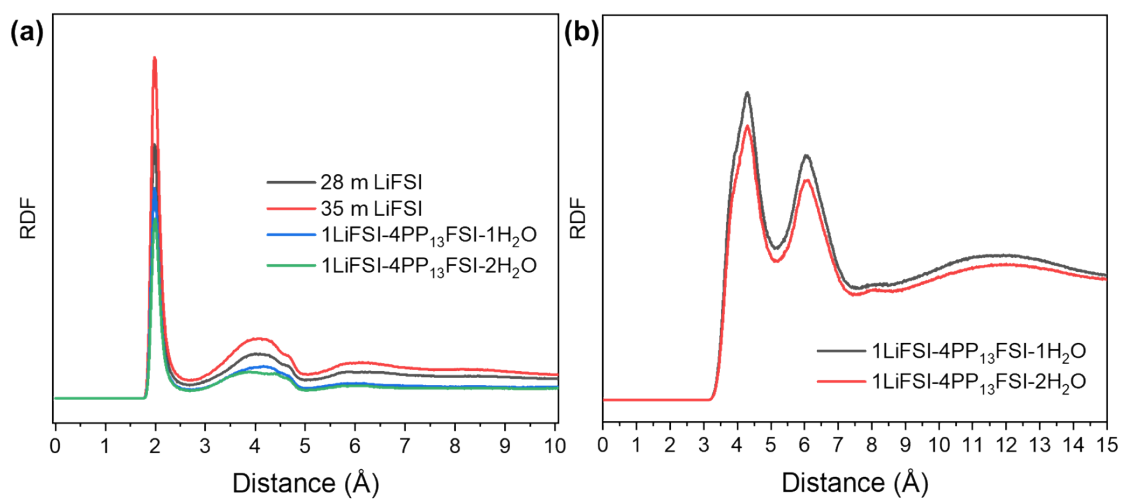

**Figure S4.** RDF plots for **a)** Li-O (FSI<sup>-</sup>) and **b)** Li-N (PP<sub>13</sub><sup>+</sup>) in different electrolytes.

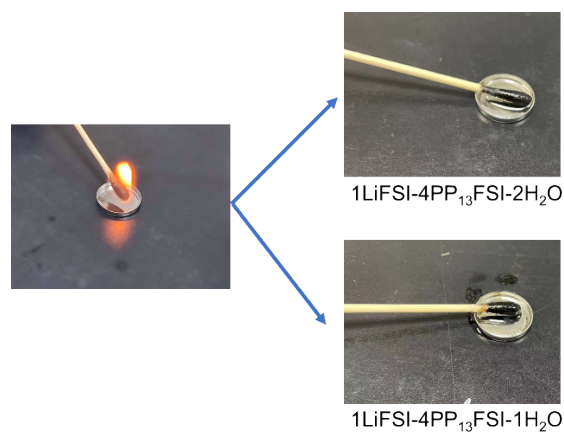

**Figure S5.** Flammability testing. An ignited cotton swab was immersed in the 1LiFSI-4PP<sub>13</sub>FSI-2H<sub>2</sub>O a) and 1LiFSI-4PP<sub>13</sub>FSI-1H<sub>2</sub>O b) electrolyte. The fire of cotton swab was extinguished in 1LiFSI-4PP<sub>13</sub>FSI-xH<sub>2</sub>O-based electrolytes.

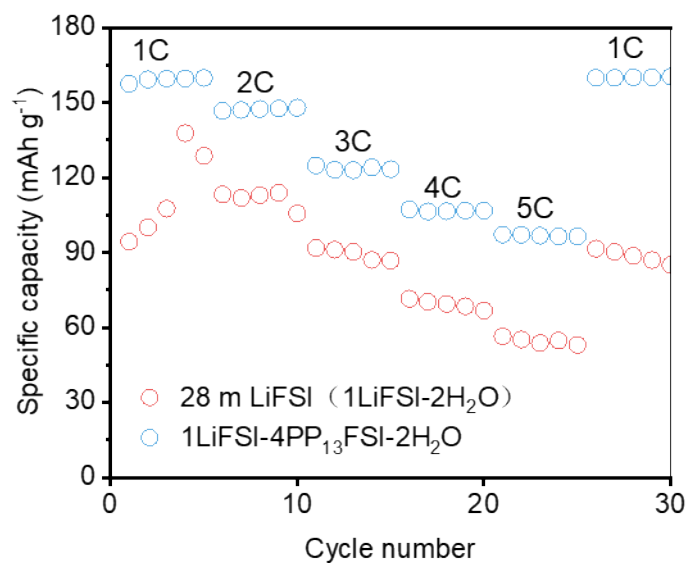

**Figure S6.** Rate performance of aqueous L-Li<sub>4</sub>Ti<sub>5</sub>O<sub>12</sub>||LiMn<sub>2</sub>O<sub>4</sub> full cells with the 28 m LiFSI electrolyte (red circles) and the 1LiFSI-4PP<sub>13</sub>FSI-2H<sub>2</sub>O electrolyte (blue circles).

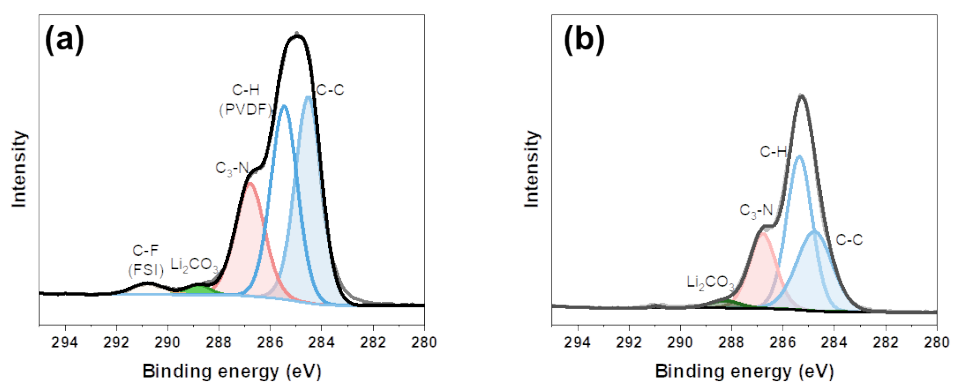

**Figure S7.** C 1s XPS spectra of cycled  $\text{Li}_4\text{Ti}_5\text{O}_{12}$  electrodes in: **a)** 1LiFSI-4PP<sub>13</sub>FSI-2H<sub>2</sub>O electrolyte, **b)** 1LiFSI-4PP<sub>13</sub>FSI-1H<sub>2</sub>O electrolyte. (30<sup>th</sup> cycle)

**Table S1.** Ratios of FSI<sup>-</sup> anions coordinated with Li<sup>+</sup> in the first coordination shell based on MD simulations for different electrolytes.

| Electrolytes                                   | Ratios of Li-FSI coordination in the first coordination shell of Li <sup>+</sup> |
|------------------------------------------------|----------------------------------------------------------------------------------|
| 28 m LiFSI                                     | 80.11%                                                                           |
| 35 m LiFSI                                     | 82.38%                                                                           |
| 1LiFSI-4PP <sub>13</sub> FSI-2H <sub>2</sub> O | 87.79%                                                                           |
| 1LiFSI-4PP <sub>13</sub> FSI-1H <sub>2</sub> O | 95.99%                                                                           |

**Table S2.** The number of molecules employed for MD simulations of different aqueous electrolytes.

| Electrolytes                                   | Number of molecules |                  |                      |
|------------------------------------------------|---------------------|------------------|----------------------|
|                                                | LiFSI               | H <sub>2</sub> O | PP <sub>13</sub> FSI |
| 28 m LiFSI                                     | 200                 | 400              | 0                    |
| 35 m LiFSI                                     | 200                 | 320              | 0                    |
| 1LiFSI-4PP <sub>13</sub> FSI-2H <sub>2</sub> O | 100                 | 200              | 400                  |
| 1LiFSI-4PP <sub>13</sub> FSI-1H <sub>2</sub> O | 100                 | 100              | 400                  |
